# Supplementary material for: Relationship between Cumulative Temperature and Light Intensity and G93 Parameters of Isoprene Emission for the Tropical Tree Ficus septica
Source: MDPI journal article supplement (doi:10.3390/plants13020243), 2024-01-15
Supplement: s1 [file s1]

## Supplementary Materials

**Table S1.** Comparison of G93 parameters between ascending and descending phases of isoprene emission on day 3.

| Parameter | Whole (Steps 1–13)            | Ascending (Steps 1–7)         | Descending (Steps 8–13)      |
|-----------|-------------------------------|-------------------------------|------------------------------|
| CT1       | 192,500 ± 17,265 <sup>a</sup> | 138,000 ± 10,432 <sup>b</sup> | 106,000 ± 2708 <sup>b</sup>  |
| CT2       | 207,000 ± 1080 <sup>a</sup>   | 273,000 ± 55,368 <sup>a</sup> | 243,500 ± 8067 <sup>a</sup>  |
| $\alpha$  | 0.0059 ± 0.0007 <sup>a</sup>  | 0.0022 ± 0.0005 <sup>b</sup>  | 0.0030 ± 0.0002 <sup>b</sup> |
| BER       | 14.3 ± 1.3 <sup>a</sup>       | 18.3 ± 2.0 <sup>a</sup>       | 22.8 ± 3.0 <sup>a</sup>      |

BER: basal emission rate. Data not sharing the same superscript letter are significantly different at  $p < 0.05$ .

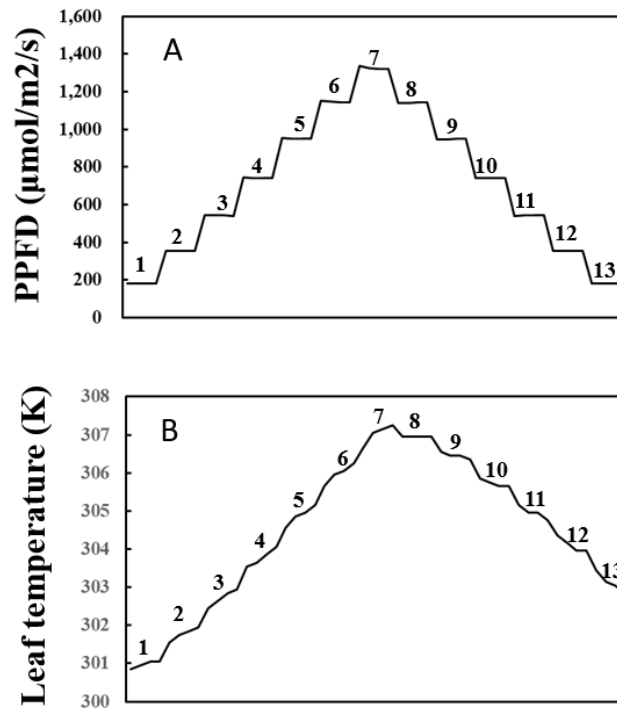

**Figure S1.** Light regime of “Ping-Pong” method (A) and typical change in leaf temperature (B). Light intensity was changed from 180 to 1,300  $\mu\text{mol}/\text{m}^2/\text{s}$  with 5 min interval and 1 round of up and down phase.

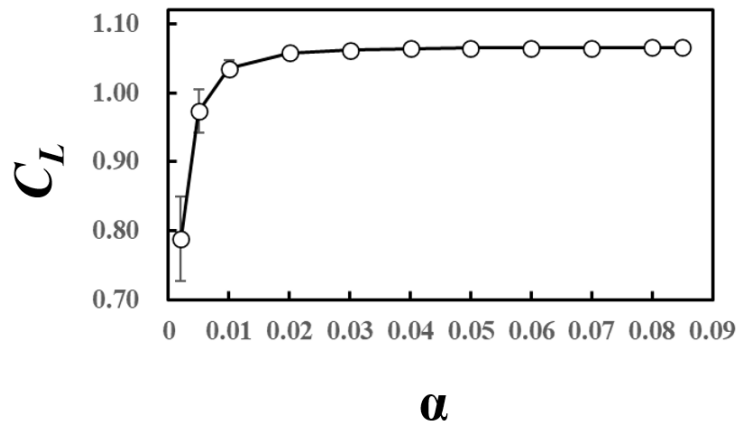

**Figure S2.** Relationship between  $\alpha$  and  $C_L$ . Data are mean  $\pm$  SE of lighting regime used for “Ping-Pong” method as indicated in Supplementary Figure S1.

## Supplementary Document S1

### $\gamma P$ and $\gamma T$ of MEGAN 2.1 for isoprene emission (Guenther et al., 2012)

$$\gamma P = C_p [(\alpha \times \text{PPFD}) / ((1 + \alpha^2 \times \text{PPFD}^2)^{0.5})]$$

where

$$\alpha = 0.004 - 0.0005 \ln(P_{240})$$

$$C_p = 0.0468 \times \exp(0.005 \times [P_{24} - P_s]) \times [P_{240}]^{0.6}$$

where

$P_s$  (standard conditions for PPFD for sun leaves) is  $200 \mu\text{mol m}^{-2} \text{s}^{-1}$

$P_{24}$  and  $P_{240}$  is the averaged PPFD of the past 24h and 240h respectively

$$\gamma T = E_{\text{opt}} \times [C_{T2} \times \exp(C_{T1} \times x) / (C_{T2} - C_{T1} \times (1 - \exp(C_{T2} \times x)))]$$

where

$$x = [(1/T_{\text{opt}}) - (1/T)] / 0.0083$$

$T$  is leaf temperature (K),  $C_{T1} = 95$ ,  $C_{T2} = 230$

$$T_{\text{opt}} = 313 + (0.6 \times (T_{240} - T_s))$$

$$E_{\text{opt}} = 2 \times \exp(0.05 \times (T_{24} - T_s)) \times \exp(0.05 \times (T_{240} - T_s))$$

Where  $T_s$  (standard conditions for average leaf temperature) is 297K

$T_{24}$  and  $T_{240}$  is the average temperature of the past 24h and 240h respectively
